# Supplementary material for: Associations of mid-childhood bisphenol A and bisphenol S exposure with mid-childhood and adolescent obesity
Source: PubMed Central journal article supplement — Environ Epidemiol. 2021 Dec 20;6(1):e187. doi: 10.1097/EE9.0000000000000187 (PMC8835638; doi:10.1097/ee9.0000000000000187), 2021-12-20
Supplement: ee9-6-e187-s001.pdf [file ee9-6-e187-s001.pdf]

# Supplemental Material

## Associations of Mid-Childhood Bisphenol A and Bisphenol S Exposure with Mid-Childhood & Adolescent Obesity

**Authors:** Priya Gajjar, Yun Liu, Nan Li, Jessie P. Buckley, Aimin Chen, Bruce P. Lanphear, Heidi J. Kalkwarf, Kim Cecil, Kimberly Yolton, Joseph M. Braun

| CONTENTS                                                                                                                                                                                                                                                     | Page # |
|--------------------------------------------------------------------------------------------------------------------------------------------------------------------------------------------------------------------------------------------------------------|--------|
| <b>Table S1.</b> Distribution of creatinine-standardized child urinary BPA and BPS concentrations in participants with and without covariate information at ages 8 and 12 years                                                                              | 2      |
| <b>Table S2.</b> Demographic characteristics of HOME Study Participants with complete data for analysis at age 8 years and 12 years.....                                                                                                                     | 3      |
| <b>Table S3:</b> Mean whole-body fat mass index z-score, visceral fat area, android fat percent, gynoid fat percent, geometric mean adiponectin, and geometric mean leptin in HOME Study participants at 12 years of age according to covariates.....        | 4      |
| <b>Table S4.</b> Adjusted difference in measures of overall and regional adiposity for a 10-fold increase in creatinine-standardized child urinary BPA and BPS concentrations at ages 8 and 12 years from sex-stratified models and interaction models ..... | 6      |
| <b>Table S5.</b> Results from models examining joint associations of BPA and BPS with measures of overall and regional adiposity at 8 and 12 years .....                                                                                                     | 8      |
| <b>Table S6.</b> Adjusted difference in whole-body FMI z-score <sup>a</sup> , body fat percentage, and gynoid fat at age 12 years by tertiles of creatinine standardized BPA and BPS with interaction term (BPA tertile*BPS tertile).....                    | 10     |
| <b>Table S7.</b> Unadjusted and adjusted difference in measures of overall and regional adiposity for a 10-fold increase in creatinine-standardized child urinary BPA and BPS concentrations with BPA and BPS included in the same model .....               | 11     |
| <b>Table S8.</b> Adjusted difference in measures of overall and regional adiposity for a 10-fold increase in creatinine-standardized child urinary BPA and BPS concentrations at age 12 years stratified by sex .....                                        | 12     |
| <b>Figure S1.</b> Chemical structure of BPA and BPS.....                                                                                                                                                                                                     | 14     |
| <b>Figure S2.</b> Flowchart of study participant selection.....                                                                                                                                                                                              | 15     |
| <b>Figure S3.</b> Directed acyclic graph of potential confounders of the association between BPA/BPS and child adiposity.....                                                                                                                                | 16     |
| <b>Figure S4.</b> Associations of creatinine-standardized BPA and BPS concentrations with adiposity measures at ages 8 and 12 years using covariate-adjusted natural cubic splines.....                                                                      | 17     |
| <b>Figure S5.</b> Estimated differences and 95% CIs in BMI z-score, body fat percentage, waist circumference at age 12 years for a 10-fold increase in creatinine-standardized child BPA and BPS urinary concentrations by child sex.....                    | 19     |
| <b>Figure S6.</b> Adjusted difference in measures of overall and regional adiposity for a 10-fold increase in creatinine-standardized child urinary BPA and BPS concentrations at age 12 years with and without adjustment for self-pubertal staging.....    | 20     |
| <b>References</b> .....                                                                                                                                                                                                                                      | 22     |

**Table S1:** Distribution of creatinine-standardized child urinary BPA and BPS concentrations in participants with and without covariate information at ages 8 and 12 years: The HOME Study

|                                                                      | Age 8 years               |                                        | Age 12 years              |                                        |
|----------------------------------------------------------------------|---------------------------|----------------------------------------|---------------------------|----------------------------------------|
|                                                                      | Complete cases<br>(n=212) | Missing covariate information<br>(n=7) | Complete cases<br>(n=181) | Missing covariate information<br>(n=5) |
| Median BPA $\mu\text{g/L}$<br>(25 <sup>th</sup> , 75 <sup>th</sup> ) | 1.6 (1, 3.6)              | 1.5 (1.2, 2)                           | 1.6 (1, 3.6)              | 1.3 (0.8, 3.4)                         |
| Median BPS $\mu\text{g/L}$<br>(25 <sup>th</sup> , 75 <sup>th</sup> ) | 0.4 (0.2, 0.7)            | 0.6 (0.3, 0.8)                         | 0.4 (0.2, 0.7)            | 0.2 (0.1, 0.4)                         |

**Table S2:** Demographic characteristics of HOME Study Participants with complete data for analysis at ages 8 years and 12 years

| Variable                         | 8 years<br>N (%) | 12 years<br>N (%) |
|----------------------------------|------------------|-------------------|
| Overall                          | 212              | 181               |
| Maternal age at delivery (years) |                  |                   |
| < 25                             | 56 (26.4)        | 47 (26.0)         |
| 25 - 35                          | 125 (59.0)       | 108 (59.7)        |
| > 35                             | 31 (14.6)        | 26 (14.4)         |
| Pre-pregnancy BMI                |                  |                   |
| Underweight-normal <25           | 111 (52.4)       | 94 (51.9)         |
| Overweight (25-<30)              | 55 (25.9)        | 48 (26.5)         |
| Obese ( $\geq$ 30)               | 46 (21.7)        | 39 (21.5)         |
| Maternal Marital Status          |                  |                   |
| Married                          | 141 (66.5)       | 116 (64.1)        |
| Unmarried, cohabitating          | 27 (12.7)        | 25 (13.8)         |
| Unmarried, living alone          | 44 (20.8)        | 40 (22.1)         |
| Maternal Education               |                  |                   |
| High School or Less              | 36 (17.0)        | 27 (14.9)         |
| Some college                     | 70 (33.0)        | 66 (36.5)         |
| Bachelors or more                | 106 (50.0)       | 88 (48.6)         |
| Insurance                        |                  |                   |
| Private                          | 140 (66.0)       | 117 (64.6)        |
| Public/uninsured                 | 72 (34.0)        | 64 (35.4)         |
| Child Race                       |                  |                   |
| Non-Hispanic Black & Other       | 89 (42.0)        | 78 (43.1)         |
| Non-Hispanic White               | 123 (58.0)       | 103 (56.9)        |
| Child Sex                        |                  |                   |
| Female                           | 116 (54.7)       | 102 (56.4)        |
| Male                             | 96 (45.3)        | 79 (43.6)         |

**Table S3:** Mean whole-body fat mass index z-score, visceral fat area, android fat percent, gynoid fat percent, geometric mean adiponectin, and geometric mean leptin in HOME Study participants at 12 years of age according to covariates

| Variable                       | N (%)      | Whole body fat mass index z-score (Mean $\pm$ SD) | Visceral fat area cm <sup>2</sup> (Mean $\pm$ SD) | Android fat % (Mean $\pm$ SD) | Gynoid fat % (Mean $\pm$ SD) | N (%)      | Adiponectin ng/mL (Geometric Mean $\pm$ Geometric SD) | Leptin ng/mL (Geometric Mean $\pm$ Geometric SD) |
|--------------------------------|------------|---------------------------------------------------|---------------------------------------------------|-------------------------------|------------------------------|------------|-------------------------------------------------------|--------------------------------------------------|
| Overall                        | 181        | 0.2 $\pm$ 0.8                                     | 45.9 $\pm$ 21.7                                   | 29.9 $\pm$ 8.5                | 36.5 $\pm$ 6.4               | 155        | 13119 $\pm$ 2                                         | 8.7 $\pm$ 3.3                                    |
| Maternal age at delivery (yrs) |            |                                                   |                                                   |                               |                              |            |                                                       |                                                  |
| < 25                           | 47 (26.0)  | 0.3 $\pm$ 0.9                                     | 46.9 $\pm$ 20.2                                   | 30.2 $\pm$ 9.4                | 35.8 $\pm$ 7.2               | 38 (24.5)  | 11837 $\pm$ 2                                         | 8.2 $\pm$ 3.4                                    |
| 25 - 35                        | 108 (59.7) | 0.2 $\pm$ 0.8                                     | 44.1 $\pm$ 19.4                                   | 29.6 $\pm$ 7.7                | 36.7 $\pm$ 5.9               | 95 (61.3)  | 13683 $\pm$ 2                                         | 8.8 $\pm$ 3.2                                    |
| > 35                           | 26 (14.4)  | 0.2 $\pm$ 0.9                                     | 51.3 $\pm$ 31.1                                   | 31.0 $\pm$ 10.3               | 37.3 $\pm$ 6.9               | 22 (14.2)  | 13065 $\pm$ 2                                         | 8.8 $\pm$ 3.5                                    |
| Pre-pregnancy BMI              |            |                                                   |                                                   |                               |                              |            |                                                       |                                                  |
| Underweight-normal (<25)       | 94 (51.9)  | 0.0 $\pm$ 0.7                                     | 41.6 $\pm$ 18.4                                   | 28.1 $\pm$ 7.4                | 35.4 $\pm$ 5.7               | 80 (51.6)  | 12883 $\pm$ 2                                         | 6.8 $\pm$ 3.0                                    |
| Overweight (25-<30)            | 48 (26.5)  | 0.4 $\pm$ 0.8                                     | 48.7 $\pm$ 25.4                                   | 30.9 $\pm$ 8.6                | 37.4 $\pm$ 6.3               | 43 (27.7)  | 16069 $\pm$ 2                                         | 9.9 $\pm$ 3.0                                    |
| Obese ( $\geq$ 30)             | 39 (21.5)  | 0.7 $\pm$ 0.9                                     | 52.7 $\pm$ 22.2                                   | 33.0 $\pm$ 10.1               | 38.1 $\pm$ 7.6               | 32 (20.6)  | 10455 $\pm$ 2                                         | 13.2 $\pm$ 3.5                                   |
| Maternal Marital Status        |            |                                                   |                                                   |                               |                              |            |                                                       |                                                  |
| Married                        | 116 (64.1) | 0.1 $\pm$ 0.8                                     | 45.5 $\pm$ 22.8                                   | 29.2 $\pm$ 8.5                | 36.3 $\pm$ 6.4               | 100 (64.5) | 13992 $\pm$ 2                                         | 7.4 $\pm$ 3.5                                    |
| Unmarried, cohabitating        | 25 (13.8)  | 0.4 $\pm$ 0.8                                     | 44.2 $\pm$ 16.2                                   | 30.7 $\pm$ 7.5                | 37.1 $\pm$ 6.4               | 22 (14.2)  | 12273 $\pm$ 2                                         | 10.8 $\pm$ 2.9                                   |
| Unmarried, living alone        | 40 (22.1)  | 0.5 $\pm$ 0.8                                     | 48.1 $\pm$ 21.5                                   | 31.5 $\pm$ 9.1                | 36.8 $\pm$ 6.6               | 33 (21.3)  | 11285 $\pm$ 2                                         | 12.2 $\pm$ 2.9                                   |
| Maternal Education             |            |                                                   |                                                   |                               |                              |            |                                                       |                                                  |
| High School or Less            | 27 (14.9)  | 0.5 $\pm$ 0.8                                     | 45.8 $\pm$ 19.1                                   | 32.0 $\pm$ 9.0                | 37.3 $\pm$ 6.9               | 23 (14.8)  | 10247 $\pm$ 2                                         | 13.3 $\pm$ 2.9                                   |
| Some college                   | 66 (36.5)  | 0.2 $\pm$ 0.9                                     | 45.6 $\pm$ 23.2                                   | 29.5 $\pm$ 9.1                | 36.0 $\pm$ 6.9               | 57 (36.8)  | 13604 $\pm$ 2                                         | 7.5 $\pm$ 3.3                                    |
| Bachelors or more              | 88 (48.6)  | 0.2 $\pm$ 0.7                                     | 46.1 $\pm$ 21.4                                   | 29.6 $\pm$ 7.9                | 36.7 $\pm$ 5.9               | 75 (48.4)  | 13767 $\pm$ 2                                         | 8.4 $\pm$ 3.3                                    |
| Insurance                      |            |                                                   |                                                   |                               |                              |            |                                                       |                                                  |
| Private                        | 117 (69.1) | 0.1 $\pm$ 0.8                                     | 45.6 $\pm$ 22.8                                   | 29.4 $\pm$ 8.3                | 36.7 $\pm$ 6.0               | 101 (65.2) | 14555 $\pm$ 2                                         | 7.8 $\pm$ 3.2                                    |
| Public/uninsured               | 64 (30.9)  | 0.4 $\pm$ 0.9                                     | 46.3 $\pm$ 19.6                                   | 30.9 $\pm$ 9.0                | 36.2 $\pm$ 7.1               | 54 (34.8)  | 10803 $\pm$ 2                                         | 10.6 $\pm$ 3.3                                   |
| Child Race                     |            |                                                   |                                                   |                               |                              |            |                                                       |                                                  |

|                                      |            |           |             |            |            |           |           |            |
|--------------------------------------|------------|-----------|-------------|------------|------------|-----------|-----------|------------|
| Non-Hispanic Black & Other           | 78 (43.1)  | 0.4 ± 0.9 | 46.8 ± 20.1 | 30.5 ± 9.4 | 35.6 ± 7.3 | 69 (44.5) | 11050 ± 2 | 9.5 ± 3.4  |
| Non-Hispanic White                   | 103 (56.9) | 0.1 ± 0.8 | 45.2 ± 22.8 | 29.5 ± 7.8 | 37.3 ± 5.5 | 86 (55.5) | 15056 ± 2 | 8.0 ± 3.1  |
| <b>Child Sex</b>                     |            |           |             |            |            |           |           |            |
| Female                               | 102 (56.4) | 0.3 ± 0.9 | 42.8 ± 25.7 | 32.5 ± 8.7 | 38.9 ± 5.3 | 85 (54.8) | 13255 ± 2 | 13.6 ± 2.9 |
| Male                                 | 79 (43.6)  | 0.2 ± 0.7 | 49.9 ± 14.2 | 26.5 ± 7.1 | 33.5 ± 6.4 | 70 (45.2) | 12957 ± 2 | 5.0 ± 3.2  |
| <b>Healthy Eating Index Score</b>    |            |           |             |            |            |           |           |            |
| Tercile 1 (<41)                      | 61 (33.7)  | 0.4 ± 0.9 | 49.6 ± 23.9 | 30.2 ± 9.4 | 36.5 ± 7.2 | 52 (33.5) | 12918 ± 2 | 9.8 ± 3.2  |
| Tercile 2 (41-<50)                   | 60 (33.1)  | 0.1 ± 0.8 | 42.0 ± 16.3 | 29.8 ± 7.7 | 36.5 ± 6.3 | 52 (33.5) | 12997 ± 2 | 8.1 ± 3.4  |
| Tercile 3 (≥50)                      | 60 (33.1)  | 0.2 ± 0.8 | 46.0 ± 23.5 | 29.8 ± 8.5 | 36.5 ± 5.7 | 51 (32.9) | 13455 ± 2 | 8.2 ± 3.2  |
| <b>Physical Activity Score (1-5)</b> |            |           |             |            |            |           |           |            |
| Tercile 1 (<2.3)                     | 61 (33.7)  | 0.5 ± 0.8 | 47.8 ± 19.9 | 31.2 ± 8.4 | 37.9 ± 6.1 | 52 (33.5) | 13016 ± 2 | 13.1 ± 3.0 |
| Tercile 2 (2.3-<2.9)                 | 60 (33.1)  | 0.2 ± 0.9 | 46.1 ± 27.0 | 31.7 ± 8.8 | 37.7 ± 6.3 | 52 (33.5) | 13949 ± 2 | 9.5 ± 3.0  |
| Tercile 3 (≥2.9)                     | 60 (33.1)  | 0.0 ± 0.8 | 43.7 ± 17.0 | 26.9 ± 7.7 | 34.0 ± 6.1 | 51 (32.9) | 12424 ± 2 | 5.2 ± 3.1  |
| <b>Pubertal Staging</b>              |            |           |             |            |            |           |           |            |
| Stage 1                              | 20 (11.0)  | 0.1 ± 0.8 | 41.5 ± 14.3 | 27.9 ± 7.9 | 36.1 ± 6.3 | 16 (10.3) | 14703 ± 1 | 6.7 ± 3.2  |
| Stage 2                              | 47 (26.0)  | 0.1 ± 0.8 | 44.3 ± 20.3 | 29.2 ± 8.2 | 36.9 ± 5.9 | 40 (25.8) | 12891 ± 2 | 6.0 ± 3.0  |
| Stage 3                              | 57 (31.5)  | 0.2 ± 0.9 | 46.6 ± 24.8 | 30.3 ± 8.8 | 36.6 ± 6.4 | 48 (31.0) | 14174 ± 2 | 8.9 ± 3.2  |
| Stage 4                              | 34 (18.8)  | 0.4 ± 0.8 | 48.1 ± 23.6 | 30.1 ± 8.7 | 36.0 ± 7.0 | 30 (19.4) | 12113 ± 2 | 10.8 ± 3.0 |
| Stage 5                              | 23 (12.7)  | 0.5 ± 0.8 | 47.9 ± 19.0 | 31.8 ± 8.9 | 36.9 ± 7.0 | 31 (13.5) | 11683 ± 2 | 14.5 ± 3.0 |

**Table S4:** Adjusted difference in measures of overall and regional adiposity for a 10-fold increase in creatinine-standardized child urinary BPA and BPS concentrations at ages 8 and 12 years from sex-stratified models and interaction models: The HOME Study

|                                           | Stratification    |                   | Sex-specific estimates from interaction model |                   | p-value |
|-------------------------------------------|-------------------|-------------------|-----------------------------------------------|-------------------|---------|
|                                           | Boys              | Girls             | Boys                                          | Girls             |         |
| <b>8 Year Outcomes</b>                    |                   |                   |                                               |                   |         |
| <b>BMI z-score<sup>a</sup></b>            |                   |                   |                                               |                   |         |
| BPA                                       | 0.0 (-0.7, 0.8)   | -0.2 (-0.8, 0.4)  | -0.1 (-0.7, 0.6)                              | -0.2 (-0.8, 0.4)  | 0.83    |
| BPS                                       | 0.0 (-0.6, 0.5)   | 0.2 (-0.2, 0.6)   | -0.1 (-0.7, 0.4)                              | 0.1 (-0.2, 0.5)   | 0.40    |
| <b>Body fat (%)</b>                       |                   |                   |                                               |                   |         |
| BPA                                       | -1.0 (-3.6, 1.6)  | -1.7 (-5.3, 1.8)  | -0.9 (-4.2, 2.4)                              | -1.4 (-4.4, 1.5)  | 0.83    |
| BPS                                       | 1.3 (-1.0, 3.5)   | 1.1 (-1.2, 3.5)   | 0.8 (-2.1, 3.7)                               | 1.2 (-0.8, 3.2)   | 0.81    |
| <b>Waist circumference (cm)</b>           |                   |                   |                                               |                   |         |
| BPA                                       | -0.6 (-4.6, 3.4)  | -1.0 (-5.7, 3.6)  | -0.5 (-5.1, 4)                                | -0.6 (-4.7, 3.5)  | 0.98    |
| BPS                                       | -1.2 (-4.8, 2.3)  | 1.4 (-1.6, 4.5)   | -2.1 (-6.2, 1.9)                              | 1.7 (-1, 4.4)     | 0.12    |
| <b>12 Year Outcomes</b>                   |                   |                   |                                               |                   |         |
| <b>BMI z-score<sup>b</sup></b>            |                   |                   |                                               |                   |         |
| BPA                                       | -0.4 (-1.2, 0.4)  | -0.2 (-0.7, 0.4)  | -0.3 (-1.0, 0.3)                              | -0.2 (-0.8, 0.4)  | 0.77    |
| BPS                                       | 0.3 (-0.3, 1.0)   | 0.0 (-0.3, 0.4)   | 0.3 (-0.3, 0.9)                               | 0 (-0.4, 0.4)     | 0.39    |
| <b>Body fat (%)</b>                       |                   |                   |                                               |                   |         |
| BPA                                       | -1.2 (-5.2, 2.7)  | -2.1 (-5.6, 1.3)  | -1.6 (-4.1, 0.9)                              | -1.6 (-4.1, 0.9)  | 0.28    |
| BPS                                       | 1.9 (-1.3, 5.1)   | -0.5 (-2.8, 1.8)  | 1.6 (-1.6, 4.7)                               | -0.6 (-2.7, 1.6)  | 0.27    |
| <b>Waist circumference (cm)</b>           |                   |                   |                                               |                   |         |
| BPA                                       | -1.2 (-8.3, 5.9)  | -5.0 (-12.0, 2.1) | -2.8 (-7.8, 2.1)                              | -2.8 (-7.8, 2.1)  | 0.58    |
| BPS                                       | 3.3 (-2.4, 9.0)   | 0.0 (-4.7, 4.6)   | 2.5 (-3.9, 8.9)                               | 0.3 (-4.0, 4.5)   | 0.56    |
| <b>FMI z-score</b>                        |                   |                   |                                               |                   |         |
| BPA                                       | -0.1 (-0.6, 0.3)  | -0.3 (-0.7, 0.2)  | -0.1 (-0.6, 0.4)                              | -0.2 (-0.6, 0.2)  | 0.69    |
| BPS                                       | 0.3 (-0.1, 0.7)   | 0.0 (-0.3, 0.3)   | 0.2 (-0.2, 0.6)                               | 0 (-0.3, 0.3)     | 0.38    |
| <b>Visceral fat area (cm<sup>2</sup>)</b> |                   |                   |                                               |                   |         |
| BPA                                       | -1.0 (-10.5, 8.6) | -5.2 (-18.8, 8.4) | 1.2 (-11.9, 14.4)                             | -5.1 (-16.4, 6.2) | 0.47    |

|                 |                  |                  |                  |                  |      |
|-----------------|------------------|------------------|------------------|------------------|------|
| BPS             | 3.7 (-4.0, 11.4) | 0.3 (-8.7, 9.2)  | 2.6 (-8.5, 13.7) | 0.0 (-7.5, 7.4)  | 0.70 |
| Android fat (%) |                  |                  |                  |                  |      |
| BPA             | -2.1 (-6.7, 2.6) | -2.6 (-7.2, 1.9) | -1.8 (-6.6, 3.0) | -2.5 (-6.6, 1.6) | 0.83 |
| BPS             | 2.2 (-1.6, 5.9)  | -0.1 (-3.1, 2.8) | 1.6 (-2.5, 5.7)  | -0.2 (-3.0, 2.5) | 0.46 |
| Gynoid fat (%)  |                  |                  |                  |                  |      |
| BPA             | -1.2 (-5.1, 2.6) | -1.5 (-4.4, 1.3) | -1.4 (-4.8, 2.0) | -1.5 (-4.4, 1.5) | 0.99 |
| BPS             | 1.6 (-1.6, 4.8)  | -0.3 (-2.2, 1.6) | 1.4 (-1.5, 4.3)  | -0.5 (-2.4, 1.5) | 0.29 |
| Adiponectin     |                  |                  |                  |                  |      |
| BPA             | 30 (-13, 94)     | 25 (-15, 83)     | 23 (-15, 80)     | 24 (-14, 78)     | 0.99 |
| BPS             | -5 (-32, 33)     | 21 (-4, 52)      | -3 (-30, 35)     | 22 (-2, 53)      | 0.26 |
| Leptin          |                  |                  |                  |                  |      |
| BPA             | -37 (-71, 37)    | -3 (-45, 73)     | -32 (-65, 30)    | -1 (-47, 87)     | 0.41 |
| BPS             | 15 (-40, 121)    | -19 (-43, 14)    | 14 (-35, 103)    | -21 (-47, 16)    | 0.28 |

<sup>a</sup> Age 8 year outcomes adjusted for child race (Black and other, Non-Hispanic White), maternal education (high school or less, some college, bachelor's or more) at the 8-year visit, maternal marital status (married, unmarried and cohabitating, unmarried and living alone) at the 8-year visit, insurance (public/uninsured, private) at the 8-year visit, maternal age (continuous, years) at delivery, maternal pre-pregnancy BMI (continuous, kg/m<sup>2</sup>), fresh fruit and vegetable consumption at the 8-year visit (daily, weekly, monthly). Body fat percentage and waist circumference further adjusted for child sex (boys, girls) and age (continuous, years).

<sup>b</sup> Age 12 year outcomes adjusted for child race, maternal education at the 8-year visit, maternal marital status at the 8-year visit, insurance at the 8-year visit, maternal age at delivery, maternal pre-pregnancy BMI (kg/m<sup>2</sup>), total healthy eating scores (continuous), and physical activity scores (continuous). Body fat percentage, waist circumference, visceral fat area, android fat, and gynoid fat were further adjusted for child sex and age.

**Table S5:** Results from models examining joint associations of BPA and BPS with measures of overall and regional adiposity at ages 8 and 12 years (model terms are 10-fold differences in BPA or BPS): The HOME Study

| Variable                                  | $\beta$ (95% CI)  | P-value |
|-------------------------------------------|-------------------|---------|
| <b>Age 8 year (n=212)</b>                 |                   |         |
| <b>BMI z-score<sup>a</sup></b>            |                   |         |
| BPA                                       | -0.2 (-0.7, 0.2)  |         |
| BPS                                       | 0.2 (-0.2, 0.7)   |         |
| BPA*BPS                                   | -0.3 (-1, 0.4)    | 0.38    |
| <b>Body fat (%)</b>                       |                   |         |
| BPA                                       | -1.9 (-4.2, 0.4)  |         |
| BPS                                       | 2.1 (-0.2, 4.4)   |         |
| BPA*BPS                                   | -1.7 (-5.1, 1.6)  | 0.32    |
| <b>Waist circumference (cm)</b>           |                   |         |
| BPA                                       | -0.6 (-3.9, 2.6)  |         |
| BPS                                       | 0.4 (-3.8, 3.6)   |         |
| BPA*BPS                                   | 0.4 (-4.3, 5.1)   | 0.86    |
| <b>Age 12 year (n=181)</b>                |                   |         |
| <b>BMI z-score<sup>b</sup></b>            |                   |         |
| BPA                                       | -0.4 (-0.8, 0.1)  |         |
| BPS                                       | 0.4 (-0.0, 0.9)   |         |
| BPA*BPS                                   | -0.5 (-1.2, 0.1)  | 0.11    |
| <b>Body Fat (%)</b>                       |                   |         |
| BPA                                       | -2.4 (-5.0, 0.1)  |         |
| BPS                                       | 2.3 (-0.2, 4.8)   |         |
| BPA*BPS                                   | -4.2 (-7.8, -0.6) | 0.03    |
| <b>Waist circumference</b>                |                   |         |
| BPA                                       | -3.5 (-8.7, 1.6)  |         |
| BPS                                       | 3.1 (-1.9, 8.1)   |         |
| BPA*BPS                                   | -3.7 (-11.1, 3.6) | 0.32    |
| <b>Whole body FMI z-score<sup>b</sup></b> |                   |         |
| BPA                                       | -0.3 (-0.6, 0.0)  |         |
| BPS                                       | 0.3 (0.0, 0.7)    |         |
| BPA*BPS                                   | -0.5 (-1.0, -0.1) | 0.02    |
| <b>Visceral fat Area (cm<sup>2</sup>)</b> |                   |         |
| BPA                                       | -4.3 (-13.3, 4.7) |         |
| BPS                                       | 5.2 (-3.6, 14.1)  |         |
| BPA*BPS                                   | -8.6 (-21.6, 4.3) | 0.19    |
| <b>Android fat (%)</b>                    |                   |         |
| BPA                                       | -3.1 (-6.4, 0.2)  |         |



|                            |                   |      |
|----------------------------|-------------------|------|
| BPS                        | 2.5 (-0.7, 5.7)   |      |
| BPA*BPS                    | -3.9 (-8.6, 0.9)  | 0.11 |
| <hr/>                      |                   |      |
| Gynoid fat (%)             |                   |      |
| <hr/>                      |                   |      |
| BPA                        | -2.3 (-4.6, -0.0) |      |
| BPS                        | 2.4 (0.2, 4.7)    |      |
| BPA*BPS                    | -4.4 (-7.8, -1.1) | 0.01 |
| <hr/>                      |                   |      |
| Adiponectin (% difference) |                   |      |
| <hr/>                      |                   |      |
| BPA                        | 17 (-11, 60)      |      |
| BPS                        | 22 (-6, 60)       |      |
| BPA*BPS                    | -19 (-45, 20)     | 0.30 |
| <hr/>                      |                   |      |
| Leptin (% difference)      |                   |      |
| <hr/>                      |                   |      |
| BPA                        | -17 (-48, 60)     |      |
| BPS                        | 0 (-38, 60)       |      |
| BPA*BPS                    | -18 (-58, 61)     | 0.57 |

<sup>a</sup> Age 8 year outcomes adjusted for child race (Black and other, Non-Hispanic White), maternal education (high school or less, some college, bachelor's or more) at the 8-year visit, maternal marital status (married, unmarried and cohabitating, unmarried and living alone) at the 8-year visit, insurance public/uninsured) at the 8-year visit, maternal age (continuous, years) at delivery, maternal pre-pregnancy BMI (continuous, kg/m<sup>2</sup>), fresh fruit and vegetable consumption at the 8-year visit (daily, weekly, monthly). Body fat percentage and waist circumference further adjusted for child sex (boys, girls) and age (continuous, years).

<sup>b</sup> Age 12 year outcomes adjusted for child race, maternal education at the 8-year visit, maternal marital status at the 8-year visit, insurance at the 8-year visit, maternal age at delivery, maternal pre-pregnancy BMI, total healthy eating scores (continuous), and physical activity scores (continuous). Body fat percentage, waist circumference, visceral fat area, android fat, and gynoid fat were further adjusted for child sex and age.

**Table S6:** Adjusted difference in whole-body FMI z-score<sup>a</sup>, body fat percentage, and gynoid fat at age 12 years by tertiles of creatinine standardized BPA and BPS with interaction term (BPA tertile\*BPS tertile): The HOME Study

|                                   | BPA Low         | BPA Medium       | BPA High         |
|-----------------------------------|-----------------|------------------|------------------|
| <b>FMI z-score<sup>b</sup></b>    |                 |                  |                  |
| BPS Low                           | Ref             | 0.3 (-0.1, 0.8)  | 0.2 (-0.3, 0.7)  |
| BPS Medium                        | 0.2 (-0.3, 0.7) | 0.0 (-0.7, 0.6)  | 0.0 (-0.7, 0.7)  |
| BPS High                          | 0.5 (0.0, 0.9)  | -0.4 (-1.0, 0.3) | -0.5 (-1.1, 0.2) |
| <b>Body fat (%)<sup>c</sup></b>   |                 |                  |                  |
| BPS Low                           | Ref             | 3.9 (0.4, 7.4)   | 1.1 (-2.7, 0.5)  |
| BPS Medium                        | 2.0 (-1.8, 5.8) | -2.7 (-8.0, 2.5) | -1.0 (-6.6, 4.6) |
| BPS High                          | 3.0 (-0.6, 6.7) | -2.9 (-8.3, 2.5) | -3.2 (-8.5, 2.2) |
| <b>Gynoid fat (%)<sup>d</sup></b> |                 |                  |                  |
| BPS Low                           | Ref             | 3.5 (0.3, 6.7)   | 1.2 (-2.3, 4.7)  |
| BPS Medium                        | 1.8 (-1.6, 5.3) | -2.1 (-6.8, 2.6) | -1.1 (-6.1, 3.9) |
| BPS High                          | 2.6 (-0.7, 5.9) | -1.6 (-6.5, 3.2) | -3.5 (-8.3, 1.3) |

<sup>a</sup> Adjusted for child race (Black and other, Non-Hispanic White), maternal education (high school or less, some college, bachelor's or more) at the 8-year visit, maternal marital status (married, unmarried and cohabitating, unmarried and living alone) at the 8-year visit, insurance (public/uninsured, private) at the 8-year visit, maternal age (years, continuous) at delivery, maternal pre-pregnancy BMI (continuous, kg/m<sup>2</sup>), total healthy eating scores (continuous), and physical activity scores (continuous). Body fat percentage and gynoid fat further adjusted for child sex (boys, girls) and age (continuous, years). BPA tertiles: 1<sup>st</sup> tertile: 0.1 – 1.5 µg/g creatinine; 2<sup>nd</sup> tertile: 1.5 – 2.7 µg/g creatinine; 3<sup>rd</sup> tertile: 2.7-121.3 µg/g creatinine; BPS tertiles: 1<sup>st</sup> tertile: 0.1-0.3 µg/g creatinine 2<sup>nd</sup> tertile: 0.3-0.6 µg/g creatinine 3<sup>rd</sup> tertile: 0.6-51.7 µg/g creatinine .

<sup>b</sup> P-value for interaction = 0.26

<sup>c</sup> P-value for interaction = 0.27

<sup>d</sup> P-value for interaction = 0.13

**Table S7:** Unadjusted and adjusted difference in measures of overall and regional adiposity for a 10-fold increase in creatinine-standardized child urinary BPA and BPS concentrations with BPA and BPS included in the same model: The HOME Study

| Outcome                              | Unadjusted              |                         | Adjusted                |                         |
|--------------------------------------|-------------------------|-------------------------|-------------------------|-------------------------|
|                                      | BPA<br>$\beta$ (95% CI) | BPS<br>$\beta$ (95% CI) | BPA<br>$\beta$ (95% CI) | BPS<br>$\beta$ (95% CI) |
| <b>Age 8 Year (n=212)</b>            |                         |                         |                         |                         |
| BMI z-score <sup>a</sup>             | -0.2 (-0.6, 0.3)        | 0.1 (-0.2, 0.5)         | -0.2 (-0.6, 0.3)        | 0.1 (-0.2, 0.4)         |
| Body Fat (%)                         | -1.6 (-3.9, 0.7)        | 1.3 (-0.5, 3.1)         | -1.5 (-3.7, 0.7)        | 1.3 (-0.4, 3.0)         |
| Waist circumference (cm)             | -1.3 (-4.5, 1.9)        | 0.5 (-1.9, 2.9)         | -0.7 (-3.8, 2.4)        | 0.6 (-1.7, 2.9)         |
| <b>Age 12 Year DXA (n=181)</b>       |                         |                         |                         |                         |
| BMI z-score <sup>b</sup>             | -0.2 (-0.7, 0.2)        | 0.2 (-0.1, 0.6)         | -0.3 (-0.7, 0.2)        | 0.2 (-0.2, 0.5)         |
| Body Fat (%)                         | -1.3 (-3.9, 1.3)        | 0.6 (-1.4, 2.5)         | -1.6 (-4.1, 0.8)        | 0.3 (-1.5, 2.1)         |
| Waist circumference (cm)             | -2.2 (-7.4, 3.1)        | 1.4 (-2.5, 5.2)         | -2.9 (-7.8, 2.1)        | 1.3 (-2.3, 4.9)         |
| Whole body FMI z-score <sup>b</sup>  | -0.2 (-0.5, 0.2)        | 0.1 (-0.1, 0.4)         | -0.2 (-0.5, 0.1)        | 0.1 (-0.1, 0.3)         |
| Visceral fat Area (cm <sup>2</sup> ) | -2.7 (-11.4, 5.9)       | 1.0 (-5.4, 7.4)         | -2.7 (-11.4, 6.0)       | 1.1 (-5.2, 7.5)         |
| Android fat (%)                      | -2.0 (-5.2, 1.2)        | 0.9 (-1.5, 3.3)         | -2.4 (-5.5, 0.8)        | 0.6 (-1.7, 3.0)         |
| Gynoid fat (%)                       | -1.3 (-3.7, 1.0)        | 0.6 (-1.2, 2.3)         | -1.5 (-3.8, 0.7)        | 0.3 (-1.4, 1.9)         |
| Adiponectin (% difference)           | 13 (-13, 46)            | 9 (-10, 32)             | 20 (-8, 57)             | 11 (-9, 34)             |
| Leptin (% difference)                | -2 (-39, 59)            | -4 (-33, 37)            | -15 (-47, 35)           | -9 (-35, 27)            |

<sup>a</sup> Age 8 year outcomes adjusted for child race (Black and other race, Non-Hispanic White), maternal education (high school or less, some college, bachelor's or more) at the 8-year visit, maternal marital status (married, unmarried and cohabitating, unmarried and living alone) at the 8-year visit, insurance public/uninsured, private) at the 8-year visit, maternal age (continuous, years) at delivery, maternal pre-pregnancy BMI (kg/m<sup>2</sup>), fresh fruit and vegetable consumption at 8-year visit (daily, weekly, monthly). Body fat percentage and waist circumference further adjusted for child sex (boys, girls) and age (continuous, years)

<sup>b</sup> Age 12 year outcomes adjusted for child race, child age, maternal education at 8-year visit, maternal marital status at 8-year visit, insurance at 8-year visit, maternal age at delivery, maternal pre-pregnancy BMI, total healthy eating scores (continuous), and physical activity scores (continuous). Body fat percentage, waist circumference, visceral fat area, android fat, and gynoid fat were further adjusted for child sex and age.

**Table S8:** Adjusted difference in measures of overall and regional adiposity for a 10-fold increase in creatinine-standardized child urinary BPA and BPS concentrations at age 12 years stratified by sex: The HOME Study

| Outcome                                   | Sex   | Adjusted for puberty |                   | No adjustment for puberty |                   |
|-------------------------------------------|-------|----------------------|-------------------|---------------------------|-------------------|
|                                           |       | $\beta$ (95% CI)     | p-for interaction | $\beta$ (95% CI)          | p-for interaction |
| <b>BMI z-score<sup>a</sup></b>            |       |                      |                   |                           |                   |
| BPA                                       | Boys  | -0.5 (-1.3, 0.2)     | 0.55              | -0.4 (-1.2, 0.4)          | 0.77              |
|                                           | Girls | -0.2 (-0.7, 0.3)     |                   | -0.2 (-0.7, 0.4)          |                   |
| BPS                                       | Boys  | 0.3 (-0.4, 0.9)      | 0.47              | 0.3 (-0.3, 1.0)           | 0.39              |
|                                           | Girls | 0.1 (-0.3, 0.4)      |                   | 0.0 (-0.3, 0.4)           |                   |
| <b>Body Fat (%)</b>                       |       |                      |                   |                           |                   |
| BPA                                       | Boys  | -1.2 (-5.3, 2.9)     | 0.26              | -1.2 (-5.2, 2.7)          | 0.28              |
|                                           | Girls | -2.1 (-5.6, 1.4)     |                   | -2.1 (-5.6, 1.3)          |                   |
| BPS                                       | Boys  | 2.3 (-1.0, 5.7)      | 0.26              | 1.9 (-1.3, 5.1)           | 0.27              |
|                                           | Girls | -0.5 (-2.9, 1.9)     |                   | -0.5 (-2.8, 1.8)          |                   |
| <b>Waist circumference (cm)</b>           |       |                      |                   |                           |                   |
| BPA                                       | Boys  | -1.3 (-8.2, 5.6)     | 0.70              | -1.2 (-8.3, 5.9)          | 0.58              |
|                                           | Girls | -4.8 (-11.8, 2.3)    |                   | -5.0 (-12.0, 2.1)         |                   |
| BPS                                       | Boys  | 2.2 (-3.4, 7.9)      | 0.68              | 3.3 (-2.4, 9.0)           | 0.56              |
|                                           | Girls | 0.5 (-4.3, 5.3)      |                   | 0.0 (-4.7, 4.6)           |                   |
| <b>Whole body FMI z-score</b>             |       |                      |                   |                           |                   |
| BPA                                       | Boys  | -0.2 (-0.6, 0.3)     | 0.78              | -0.1 (-0.6, 0.3)          | 0.69              |
|                                           | Girls | -0.3 (-0.7, 0.2)     |                   | -0.3 (-0.7, 0.2)          |                   |
| BPS                                       | Boys  | 0.3 (-0.1, 0.6)      | 0.42              | 0.3 (-0.1, 0.7)           | 0.38              |
|                                           | Girls | 0.0 (-0.3, 0.3)      |                   | 0.0 (-0.3, 0.3)           |                   |
| <b>Visceral fat Area (cm<sup>2</sup>)</b> |       |                      |                   |                           |                   |
| BPA                                       | Boys  | -0.7 (-10.2, 8.9)    | 0.50              | -1.0 (-10.5, 8.6)         | 0.47              |
|                                           | Girls | -4.8 (-18.6, 9.1)    |                   | -5.2 (-18.8, 8.4)         |                   |
| BPS                                       | Boys  | 3.0 (-4.8, 10.7)     | 0.71              | 3.7 (-4.0, 11.4)          | 0.70              |
|                                           | Girls | 0.6 (-8.7, 10.0)     |                   | 0.3 (-8.7, 9.2)           |                   |
| <b>Android fat (%)</b>                    |       |                      |                   |                           |                   |
| BPA                                       | Boys  | -2.1 (-6.9, 2.8)     | 0.83              | -2.1 (-6.7, 2.6)          | 0.83              |
|                                           | Girls | -2.6 (-7.2, 2.0)     |                   | -2.6 (-7.2, 1.9)          |                   |
| BPS                                       | Boys  | 2.5 (-1.4, 6.5)      | 0.43              | 2.2 (-1.6, 5.9)           | 0.46              |
|                                           | Girls | -0.1 (-3.2, 3.0)     |                   | -0.1 (-3.1, 2.8)          |                   |
| <b>Gynoid fat (%)</b>                     |       |                      |                   |                           |                   |
| BPA                                       | Boys  | -1.2 (-5.1, 2.8)     | 0.93              | -1.2 (-5.1, 2.6)          | 0.99              |

|                            |       |                  |      |                  |      |
|----------------------------|-------|------------------|------|------------------|------|
| BPS                        | Girls | -1.5 (-4.4, 1.4) | 0.25 | -1.5 (-4.4, 1.3) | 0.29 |
|                            | Boys  | 2.4 (-0.9, 5.6)  |      | 1.6 (-1.6, 4.8)  |      |
|                            | Girls | -0.3 (-2.3, 1.6) |      | -0.3 (-2.2, 1.6) |      |
| Adiponectin (% difference) |       |                  |      |                  |      |
| BPA                        | Boys  | 23 (-18, 86)     | 0.96 | 30 (-13, 94)     | 0.99 |
|                            | Girls | 23 (-17, 81)     |      | 25 (-15, 83)     |      |
| BPS                        | Boys  | 1 (-28, 42)      | 0.27 | -5 (-32, 33)     | 0.26 |
|                            | Girls | 20 (-5, 53)      |      | 21 (-4, 52)      |      |
| Leptin (% difference)      |       |                  |      |                  |      |
| BPA                        | Boys  | -41 (-74, 33)    | 0.32 | -37 (-71, 37)    | 0.41 |
|                            | Girls | -5 (-47, 69)     |      | -3 (-45, 73)     |      |
| BPS                        | Boys  | 15 (-42, 127)    | 0.33 | 15 (-40, 121)    | 0.28 |
|                            | Girls | -16 (-41, 20)    |      | -19 (-43, 14)    |      |

<sup>a</sup> Age 12 years outcomes adjusted for child race, child age, maternal education at 8-year visit, maternal marital status at 8-year visit, insurance at 8-year visit, maternal age at delivery (continuous, years), maternal pre-pregnancy BMI, total healthy eating scores (continuous), and physical activity scores (continuous). Body fat percentage, waist circumference, visceral fat area, android fat, gynoid fat, adiponectin, and leptin were further adjusted for child sex and age. The number of participants for boys was 79 and 102 for girls.

**Figure S1:** Chemical structure of BPA and BPS (Russo et al., 2017, p.68).

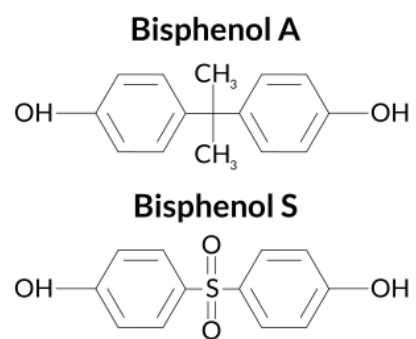

**Figure S2: Flowchart of study participant selection**

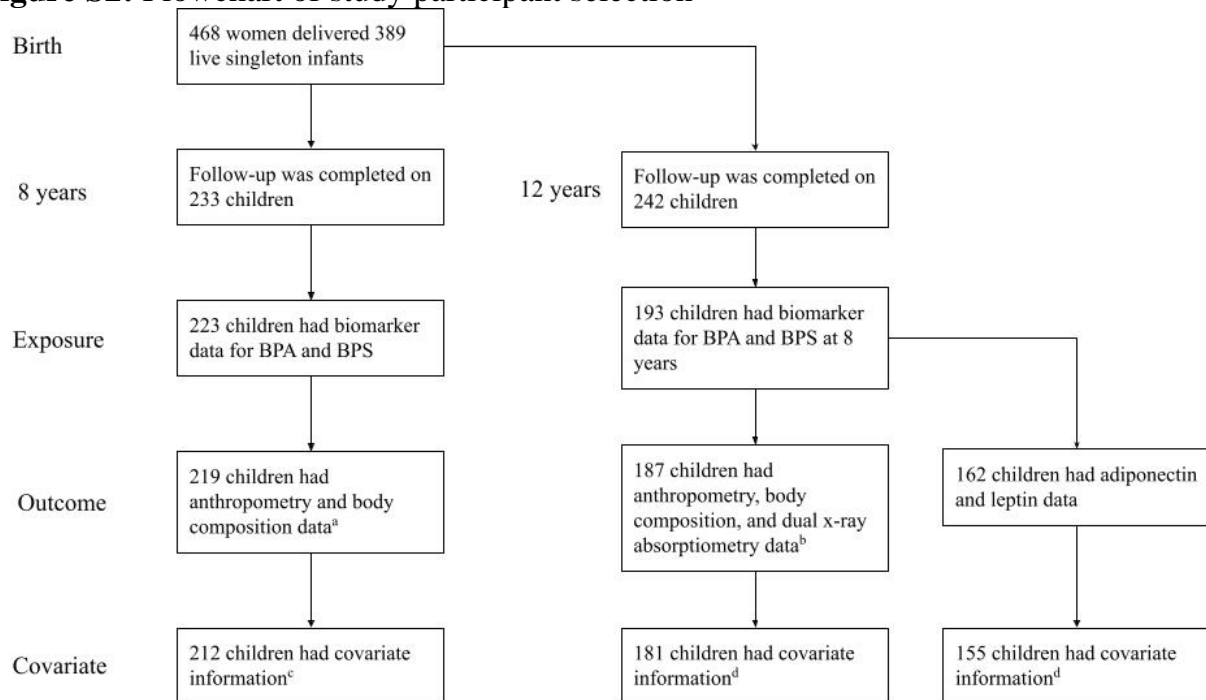

<sup>a</sup> Body mass index z-score, body fat percentage, waist circumference

<sup>b</sup> BMI z-score, body fat percentage, waist circumference, whole body FMI z-score, visceral fat area, android fat, gynoid fat

<sup>c</sup> Child race, maternal education, maternal marital status at the 8-year visit, insurance, maternal age at delivery, maternal pre-pregnancy, fresh fruit and vegetable consumption

<sup>d</sup> Child race, maternal education, maternal marital status, insurance, maternal age at delivery, maternal pre-pregnancy BMI, total healthy eating scores, physical activity scores, child sex and age

**Figure S3:** Directed acyclic graph of potential confounders of the association between BPA/BPS and child adiposity<sup>2</sup>

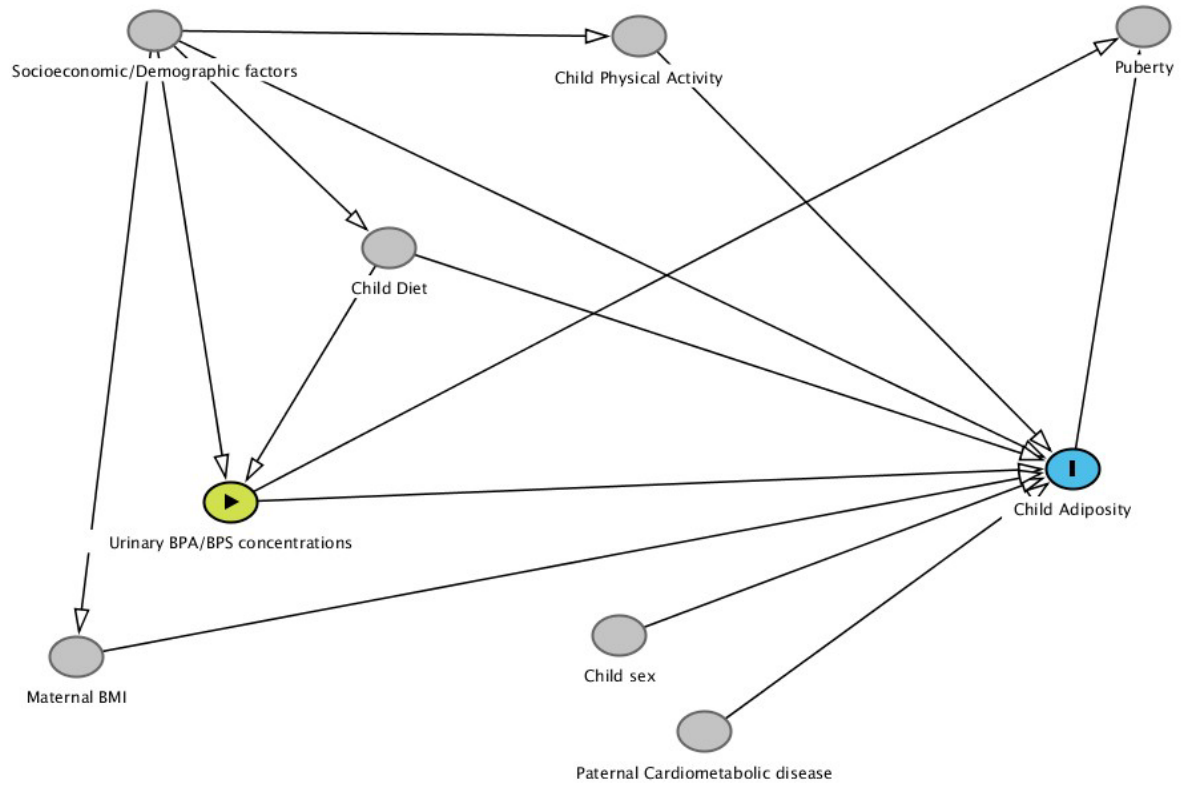



**Figure S4:** Associations of creatinine-standardized BPA and BPS concentrations with adiposity measures at ages 8 and 12 years using covariate-adjusted natural cubic splines: The HOME Study

**8 Year Outcomes<sup>a</sup>**

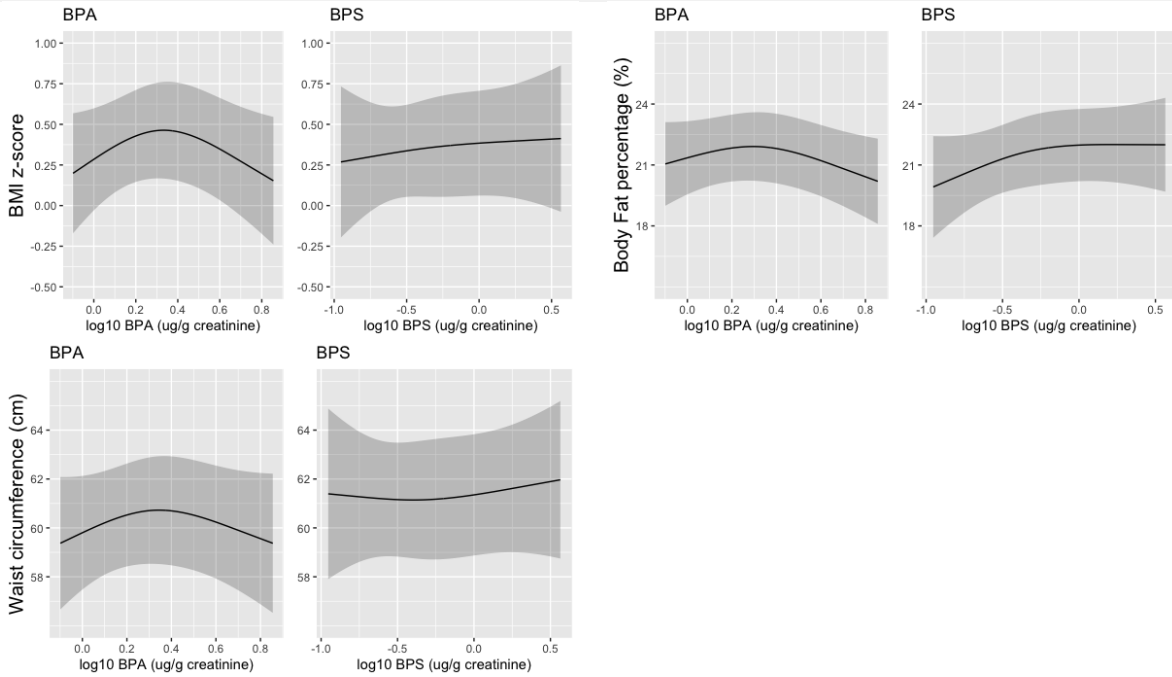

**12 Year Outcomes<sup>b</sup>**

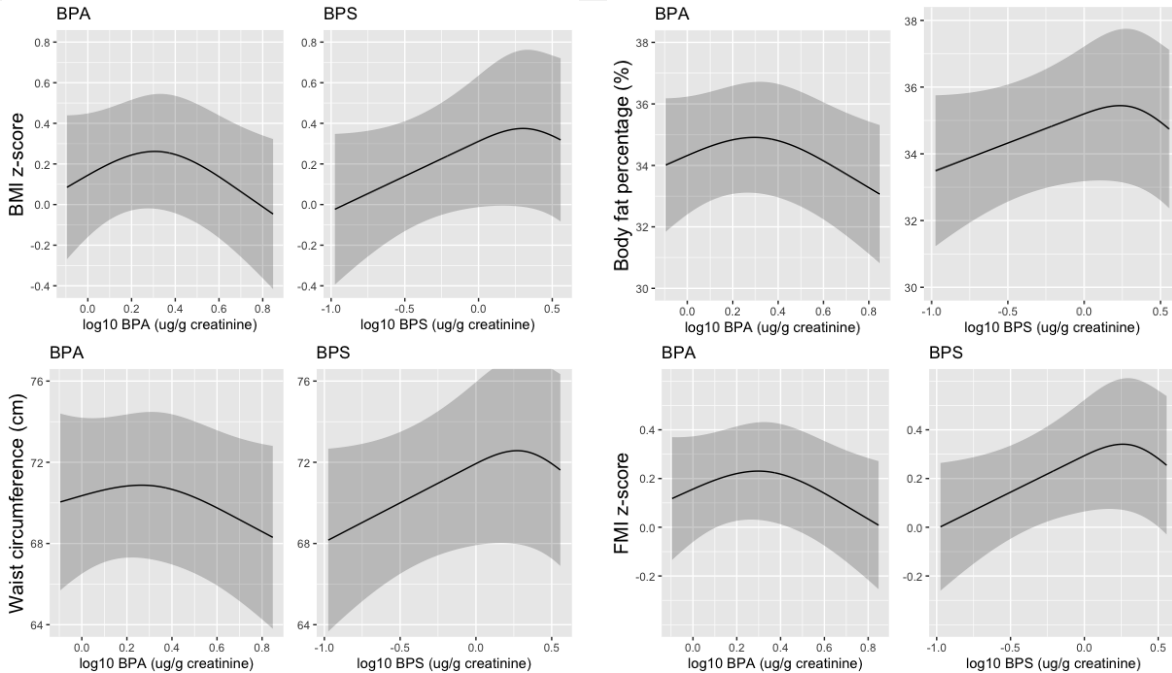

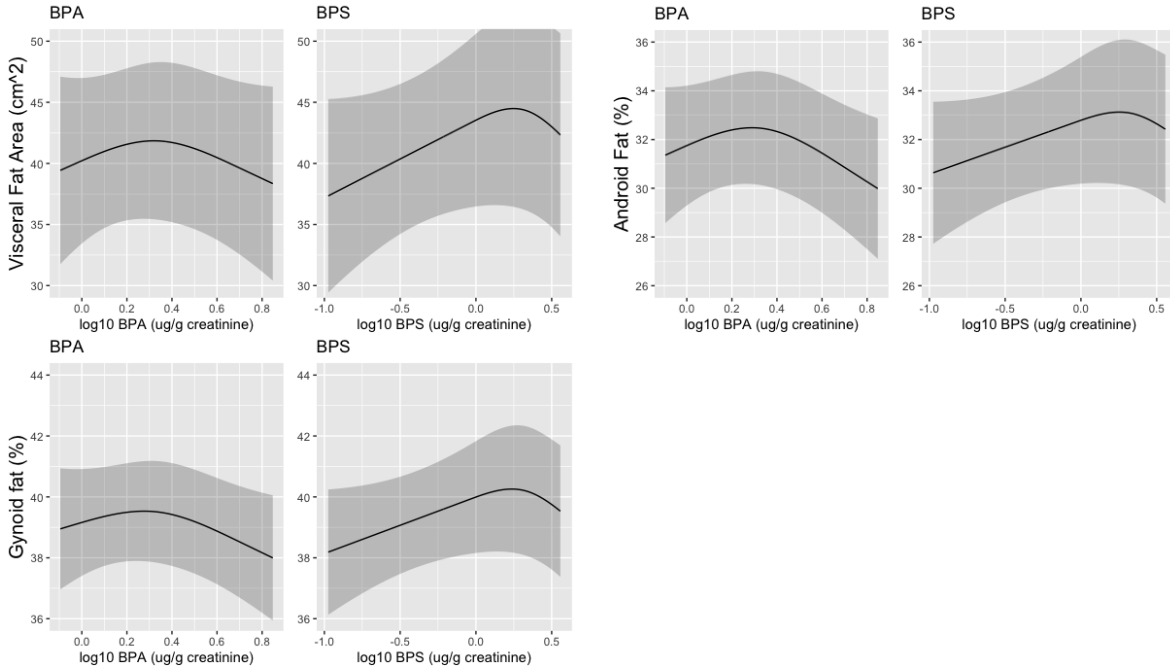

<sup>a</sup> Adjusted for child race (Black and other race, Non-Hispanic White), maternal education (high school or less, some college, bachelor's or more) at the 8-year visit, maternal marital status (married, unmarried and cohabitating, unmarried and living alone) at the 8-year visit, insurance public/uninsured) at the 8-year visit, maternal age (continuous, years) at delivery, maternal pre-pregnancy BMI (continuous, kg/m<sup>2</sup>), fresh fruit and vegetable consumption at 8-year visit (daily, weekly, monthly). Body fat percentage and waist circumference further adjusted for child sex (boys, girls) and age (continuous, years)

<sup>b</sup> Adjusted for child race, maternal education at 8-year visit, maternal marital status at 8-year visit, insurance at 8-year visit, maternal age at delivery, maternal pre-pregnancy BMI, total healthy eating scores (continuous) and physical activity scores (continuous). Body fat percentage, waist circumference, visceral fat area, android fat, and gynoid fat were further adjusted for child sex and age.

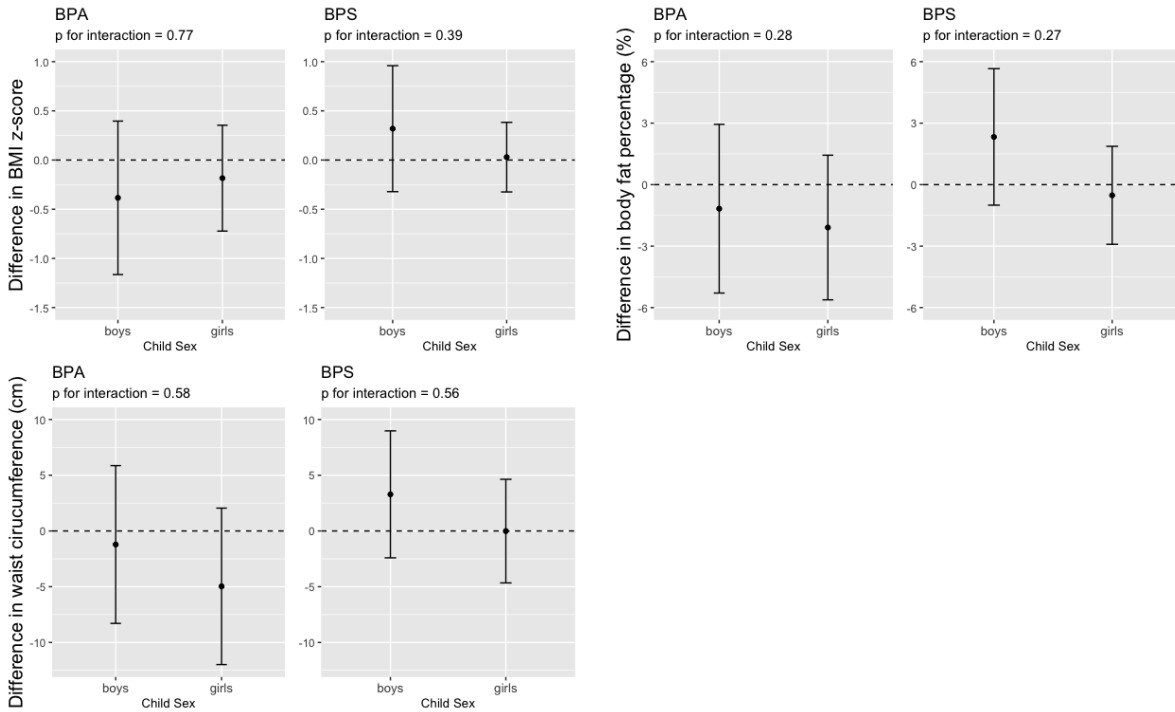

**Figure S5:** Estimated differences and 95% CIs in BMI z-score, body fat percentage, waist circumference at age 12 years for a 10-fold increase in creatinine-standardized child BPA and BPS urinary concentrations by child sex.

BMI z-score was adjusted for child race (Black and other, Non-Hispanic White), maternal education (high school or less, some college, bachelor's or more) at the 8-year visit, maternal marital status (married, unmarried and cohabitating, unmarried and living alone) at the 8-year visit, insurance (public/uninsured, private) at the 8-year visit, maternal age (continuous, years) at delivery, maternal pre-pregnancy BMI (continuous, kg/m<sup>2</sup>), total healthy eating scores (continuous), and physical activity scores (continuous). Body fat percentage and waist circumference were further adjusted for child age (continuous, years).

**Figure S6:** Adjusted difference in measures of overall and regional adiposity<sup>a</sup> for a 10-fold increase in creatinine-standardized child urinary BPA and BPS concentrations at age 12 years with and without adjustment for self-pubertal staging: The HOME Study

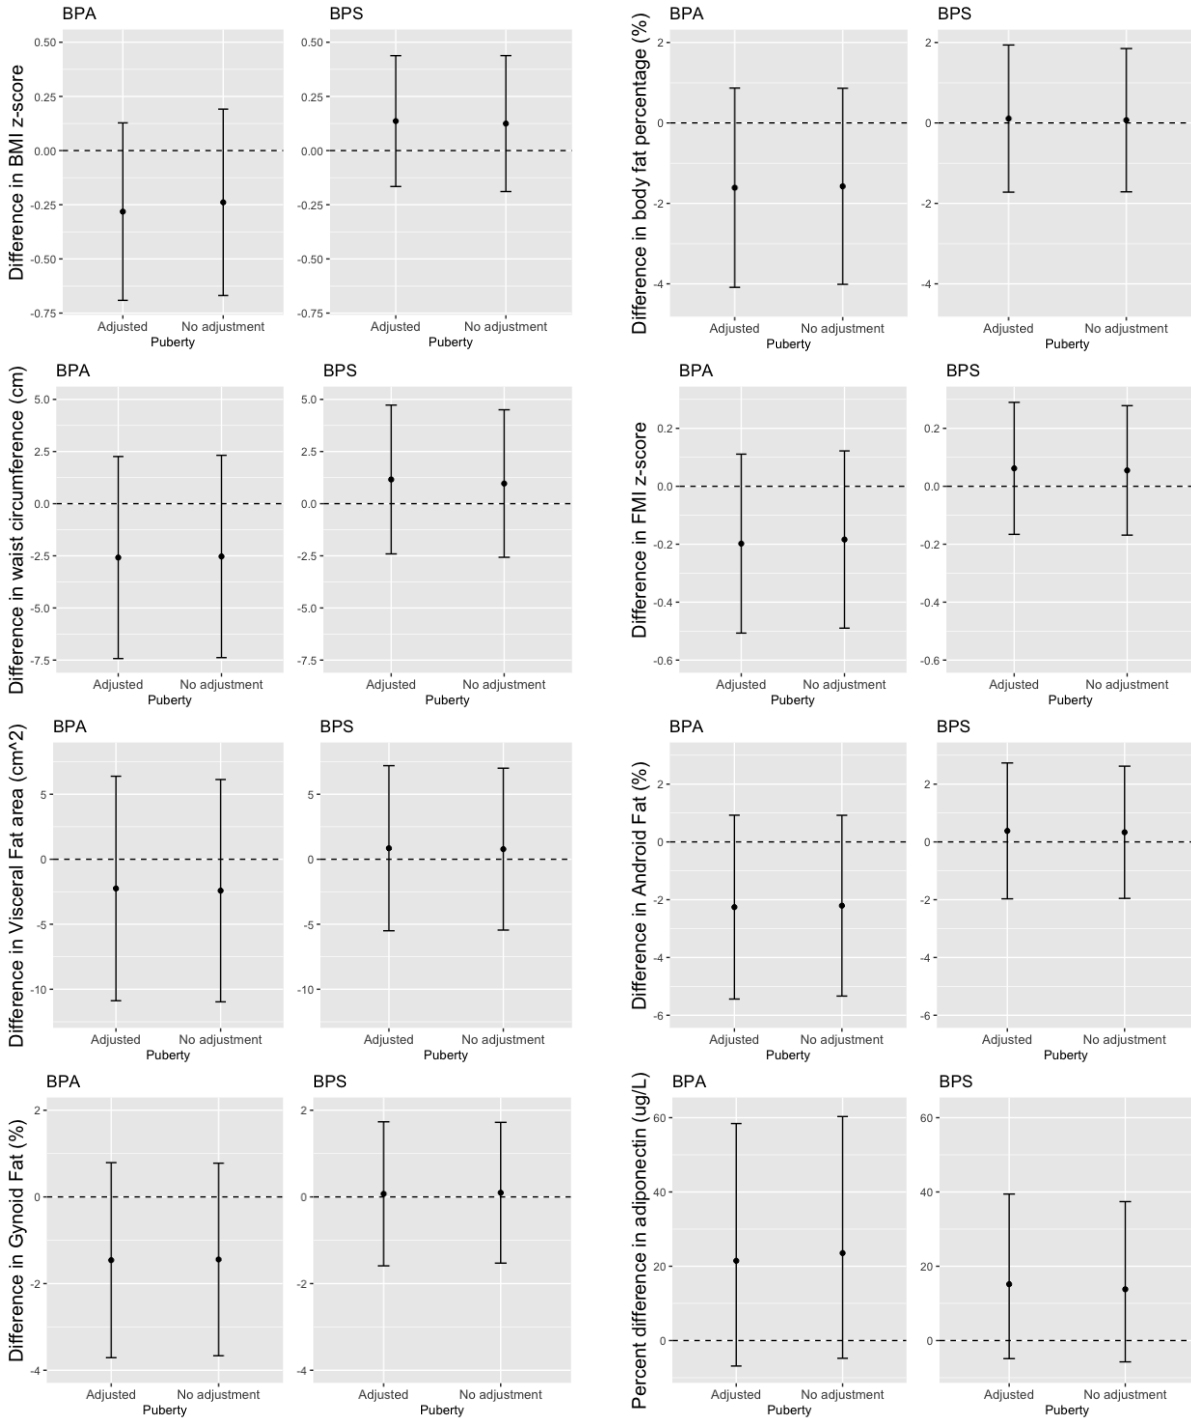

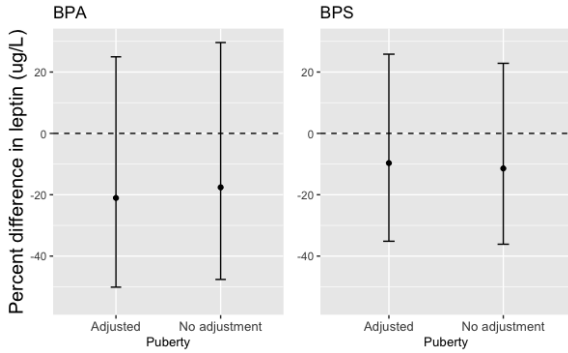

<sup>a</sup> Age 12 year outcomes adjusted for child race (Black and other, Non-Hispanic White), child age (continuous years), maternal education at 8-year visit (high school or less, some college, bachelor's or more), maternal marital status at 8-year visit (married, unmarried and cohabitating, unmarried and living alone), insurance at 8-year visit (public/uninsured, private), maternal age at delivery (continuous, years), maternal pre-pregnancy BMI (continuous, kg/m<sup>2</sup>), total healthy eating scores (continuous), and physical activity scores (continuous). Body fat percentage, waist circumference, visceral fat area, android fat, and gynoid fat, adiponectin, and leptin were further adjusted for child sex and age.

## References

1. Russo, G., Barbato, F. & Grumetto, L. Monitoring of bisphenol A and bisphenol S in thermal paper receipts from the Italian market and estimated transdermal human intake: A pilot study. *Sci. Total Environ.* **599–600**, 68–75 (2017).
2. Textor, J., van der Zander, B., Gilthorpe, M. S., *et al.* Robust causal inference using directed acyclic graphs: the R package ‘dagitty’. *Int. J. Epidemiol.* **45**, 1887–1894 (2016).
